# Supplementary material for: Application of Five Different Chlorella sp. Microalgal Strains for the Treatment of Vegetation Waters Derived from Unconventional Oil Extractions Enriched with Citrus Byproducts
Source: MDPI journal article supplement (doi:10.3390/foods11101398), 2022-05-12
Supplement: s1 [file s1]

## Supplementary Material

# Application of Five Different *Chlorella* sp. Microalgal Strains for the Treatment of Vegetation Waters Derived from Unconventional Oil Extractions Enriched with Citrus Byproducts

Monica Macaluso<sup>1§</sup>, Carolina Chiellini<sup>2§\*</sup>, Adriana Ciurli<sup>1</sup>, Lorenzo Guglielminetti<sup>1,3</sup>, Basma Najar<sup>1</sup>, Isabella Taglieri<sup>1</sup>, Chiara Sanmartin<sup>1</sup>, Alessandro Bianchi<sup>1</sup>, Francesca Venturi<sup>1,3</sup> and Angela Zinnai<sup>1,3</sup>

<sup>1</sup> Department of Agriculture, food and Environment, University of Pisa, Via del Borghetto 80, 54126 Pisa (Italy)

<sup>2</sup> Italian National Research Council, Institute of Agricultural Biology and Biotechnology Via Moruzzi, 1 56124 Pisa (Italy)

<sup>3</sup> Interdepartmental Research Centre "Nutraceuticals and Food for Health", University of Pisa, Via del Borghetto 80, Pisa, 56124, Italy

§ these authors contributed equally to the work

\* Correspondence: author:

Carolina Chiellini: carolina.chiellini@ibba.cnr.it.

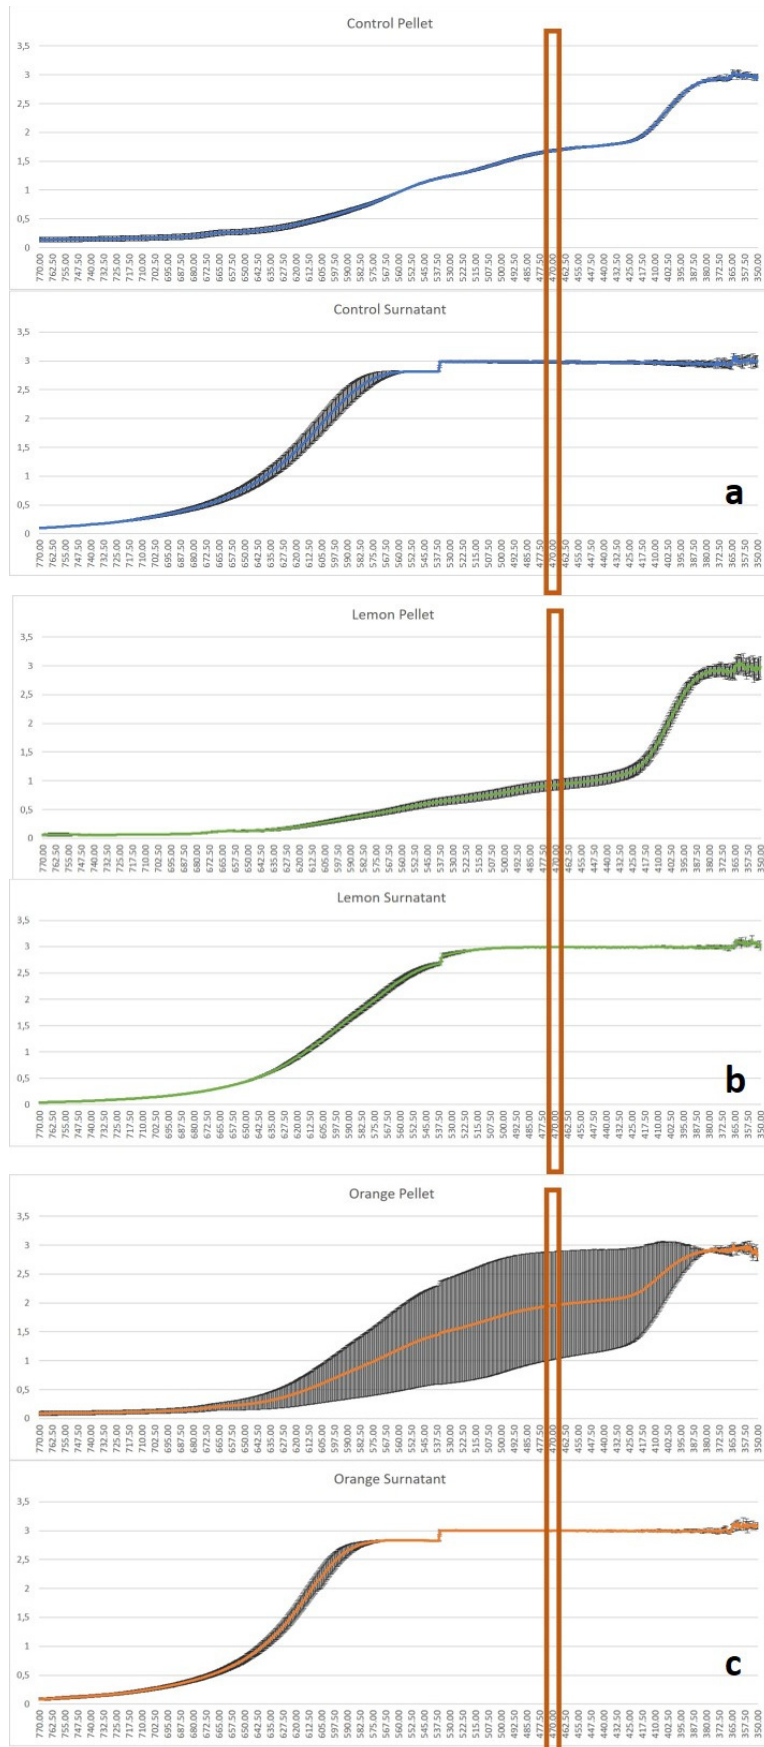

**Supplementary Figure S1.** Emission spectra of the pellets and supernatants of the three different vegetation waters: (a) control, (b) lemon and (c) orange. Bars represent the standard error calculated on three replicate spectrophotometric measures.
